# Supplementary material for: Construction of LaF3 QD-modified SnS2 nanorod composites for ultrasensitive detection of H2S
Source: Royal Society of Chemistry journal article supplement (doi:10.1039/d2ta08496a), 2023-01-01
Supplement: d2ta08496a1.pdf [file d2ta08496a1.pdf]

## **Construction of LaF<sub>3</sub> QDs-modified SnS<sub>2</sub> nanorod composites for ultrasensitive detection of H<sub>2</sub>S**

**Mingcong Tang<sup>a</sup>, Zijian Wang<sup>a</sup>, Dongyue Wang<sup>a</sup>, Ruiyuan Mao<sup>a</sup>, Hao Zhang<sup>a</sup>,  
Wei Xu<sup>b</sup>, Zhe Yang<sup>b\*</sup>, Dongzhi Zhang<sup>a\*</sup>**

<sup>a</sup> College of Control Science and Engineering, China University of Petroleum (East China), Qingdao 266580, China

<sup>b</sup> State Key Laboratory of Safety and Control for Chemicals, SINOPEC Research Institute of Safety Engineering Co., Ltd., Qingdao, 266071, China.

\*Corresponding authors: Dongzhi Zhang, Zhe Yang

E-mail address: [dzzhang@upc.edu.cn](mailto:dzzhang@upc.edu.cn), [yangzhe.qday@sinopec.com](mailto:yangzhe.qday@sinopec.com)

Tel: +86-532-86982928

Fax: +86-532-86983326

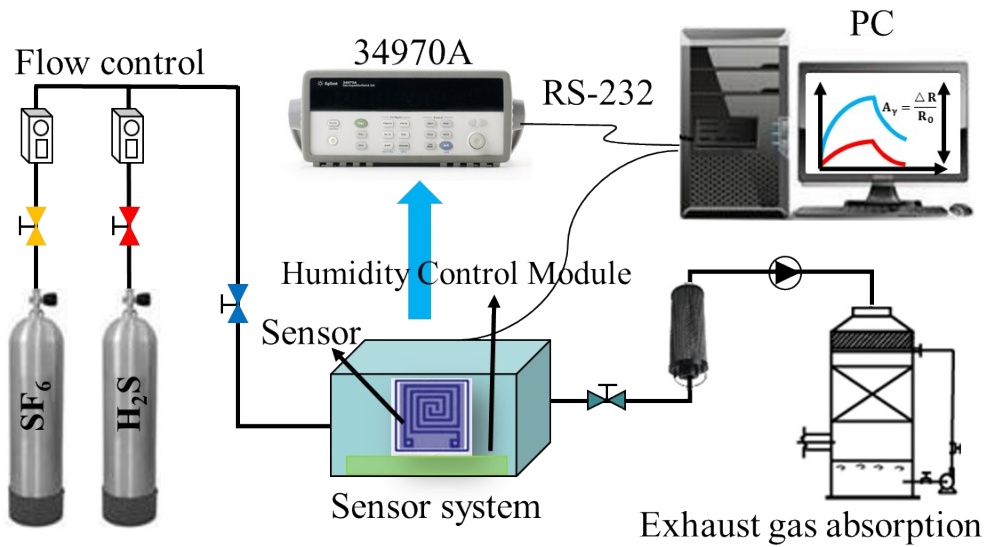

Fig. S1. Dynamic air distribution test system.

In this paper, a dynamic gas distribution device is used for gas mixing settings, as shown in Fig. S1. A gas flow valve is used to control the flow rate of the gas to achieve different concentration ratios of the gas. 34970A is used to collect the digital signal from the sensor test system. This device is equipped with an exhaust gas absorption device, which can prevent toxic and harmful gases from being released into the air. The humidity influence experiment involves controlling the humidity environment in the test system through the humidity control module. The humidity influence experiment's goal is to expose the target gas to various humidity environments in order to measure the sensor's response and observe the change in response to determine the influence of humidity on the sensor.

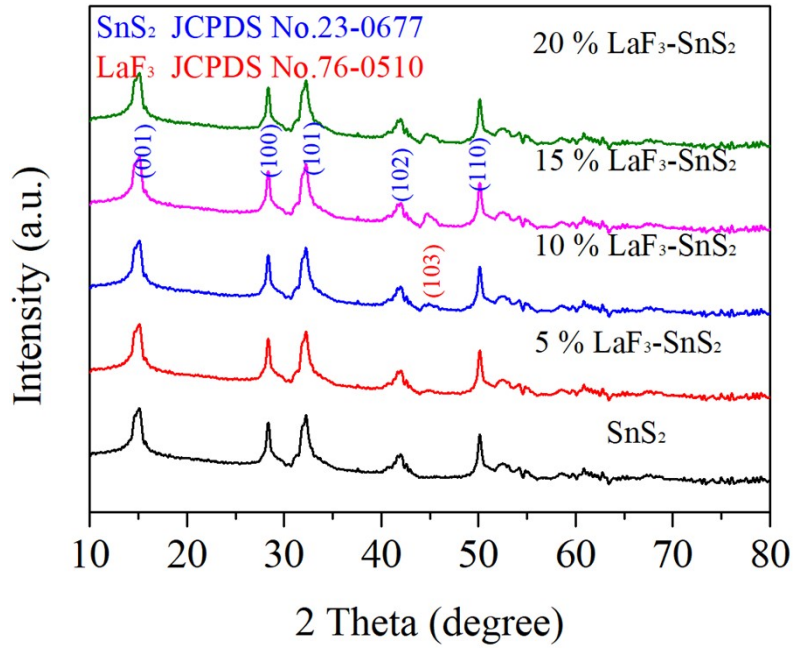

Fig. S2. The XRD characterization of SnS<sub>2</sub> nanorods modified with different LaF<sub>3</sub> QDs.

The XRD characterization of LaF<sub>3</sub> QDs modified SnS<sub>2</sub> is shown in Fig. 2. After analyzing the XRD pattern, it can be known that the standard card corresponding to SnS<sub>2</sub> is JCPDS No.23-0677. With the increase of the content of LaF<sub>3</sub> QDs modified SnS<sub>2</sub>, the (2-1-1) characteristic peak of LaF<sub>3</sub> appeared in the XRD curve. As the LaF<sub>3</sub> QDs content increases, the characteristic peak intensity also increases. When the content of LaF<sub>3</sub> QDs increased to 15%, the characteristic peak intensity was the strongest. When the LaF<sub>3</sub> content is 20%, the characteristic peak intensity decreases. The variation of this characteristic peak may be related to the gas-sensing characteristics of the sensor.
